# Supplementary material for: Is higher dose always the right answer in stereotactic body radiation therapy for small hepatocellular carcinoma?
Source: PubMed Central journal article supplement — Radiat Oncol J. 2018 Jun 29;36(2):129–38. doi: 10.3857/roj.2017.00598 (PMC6074068; doi:10.3857/roj.2017.00598), 2018-06-29
Supplement: roj-2017-00598-suppl1.pdf [file roj-2017-00598-suppl1.pdf]

**Table S1.** Constraints to organs at risk

| OAR                    | Volume (mL)         | Maximum dose (Gy)<br>in 3 fx |
|------------------------|---------------------|------------------------------|
| Esophagus max          | <0.5                | 24                           |
| Stomach max            | <0.5                | 16                           |
|                        | <5                  | 13.5                         |
| Duodenum max           | <0.5                | 16                           |
|                        | <5                  | 13.5                         |
| Small bowel max        | <0.5                | 16                           |
|                        | <5                  | 13.5                         |
| Large bowel max        | <0.5                | 16                           |
|                        | <5                  | 13.5                         |
| Heart/pericardium      | <30                 | 16                           |
| Great vessel max       | <0.5                | 32                           |
| Spinal cord + 5 mm max | <0.5                | 13.5                         |
| Kidneys                | Bilateral mean dose | <10                          |
| Skin max               | <0.5                | 24                           |
| Chest wall max         | <0.5                | 26.8                         |
| Gallbladder max        | <0.5                | 29.4                         |
| Common bile duct max   | <0.5                | 26.8                         |
