# Supplementary material for: Is higher dose always the right answer in stereotactic body radiation therapy for small hepatocellular carcinoma?
Source: PubMed Central journal article supplement — Radiat Oncol J. 2018 Jun 29;36(2):129–38. doi: 10.3857/roj.2017.00598 (PMC6074068; doi:10.3857/roj.2017.00598), 2018-06-29
Supplement: roj-2017-00598-suppl2.pdf [file roj-2017-00598-suppl2.pdf]

**Table S2.** Gastrointestinal and other toxicities (CTCAE grade)

|                                 | Grade 1 | Grade 2 | Grade 3 | Grade 4 |
|---------------------------------|---------|---------|---------|---------|
| Post-RT EGD after 3 mo (n = 21) |         |         |         |         |
| Gastric ulcer                   | 1 (2.3) | 0 (0)   | 0 (0)   | 0 (0)   |
| Gastric erosion                 | 2 (4.5) | 0 (0)   | 0 (0)   | 0 (0)   |
| Adverse event in 3 mo           |         |         |         |         |
| Fatigue                         | 4 (9.1) | 0 (0)   | 0 (0)   | 0 (0)   |
| Dyspepsia                       | 4 (9.1) | 0 (0)   | 0 (0)   | 0 (0)   |
| Nausea                          | 2 (4.5) | 0 (0)   | 0 (0)   | 0 (0)   |
| Radiation dermatitis            | 1 (2.3) | 1 (2.3) | 0 (0)   | 0 (0)   |
| Abdominal pain                  | 1 (2.3) | 0 (0)   | 0 (0)   | 0 (0)   |
| Chest wall pain                 | 2 (4.5) | 0 (0)   | 0 (0)   | 0 (0)   |

Values are presented as number (%).

CTCAE, Common Terminology Criteria for Adverse Events; RT, radiation therapy; EGD, esophagogastroduodenoscopy.
