# Supplementary figures and images for: Is higher dose always the right answer in stereotactic body radiation therapy for small hepatocellular carcinoma?
Source: PubMed Central journal article supplement — Radiat Oncol J. 2018 Jun 29;36(2):129–38. doi: 10.3857/roj.2017.00598 (PMC6074068; doi:10.3857/roj.2017.00598), 2018-06-29

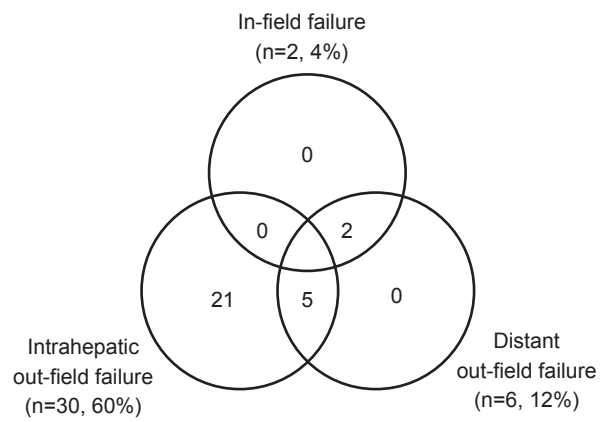

**Fig S1.** Failure pattern related to radiation therapy target volume.

Supplement: roj-2017-00598-suppl3.pdf [file roj-2017-00598-suppl3.pdf]

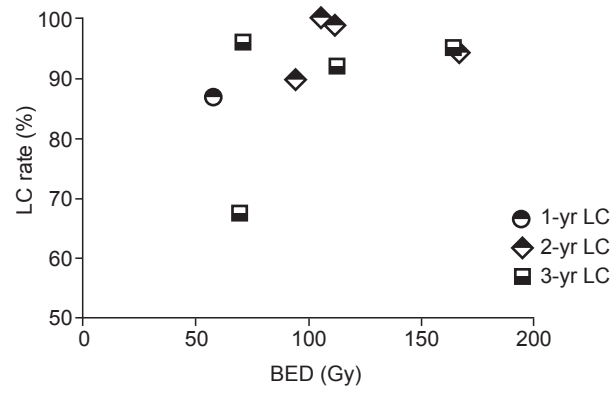

**Fig S2.** Local control (LC) rates related to biologically equivalent dose (BED) in other studies.

Supplement: roj-2017-00598-suppl4.pdf [file roj-2017-00598-suppl4.pdf]
